# Supplementary material for: Focusing the diversity of Gardnerella vaginalis through the lens of ecotypes
Source: PubMed Central journal article supplement (PMC5881158; doi:10.1111/eva.12555), 2017-11-16

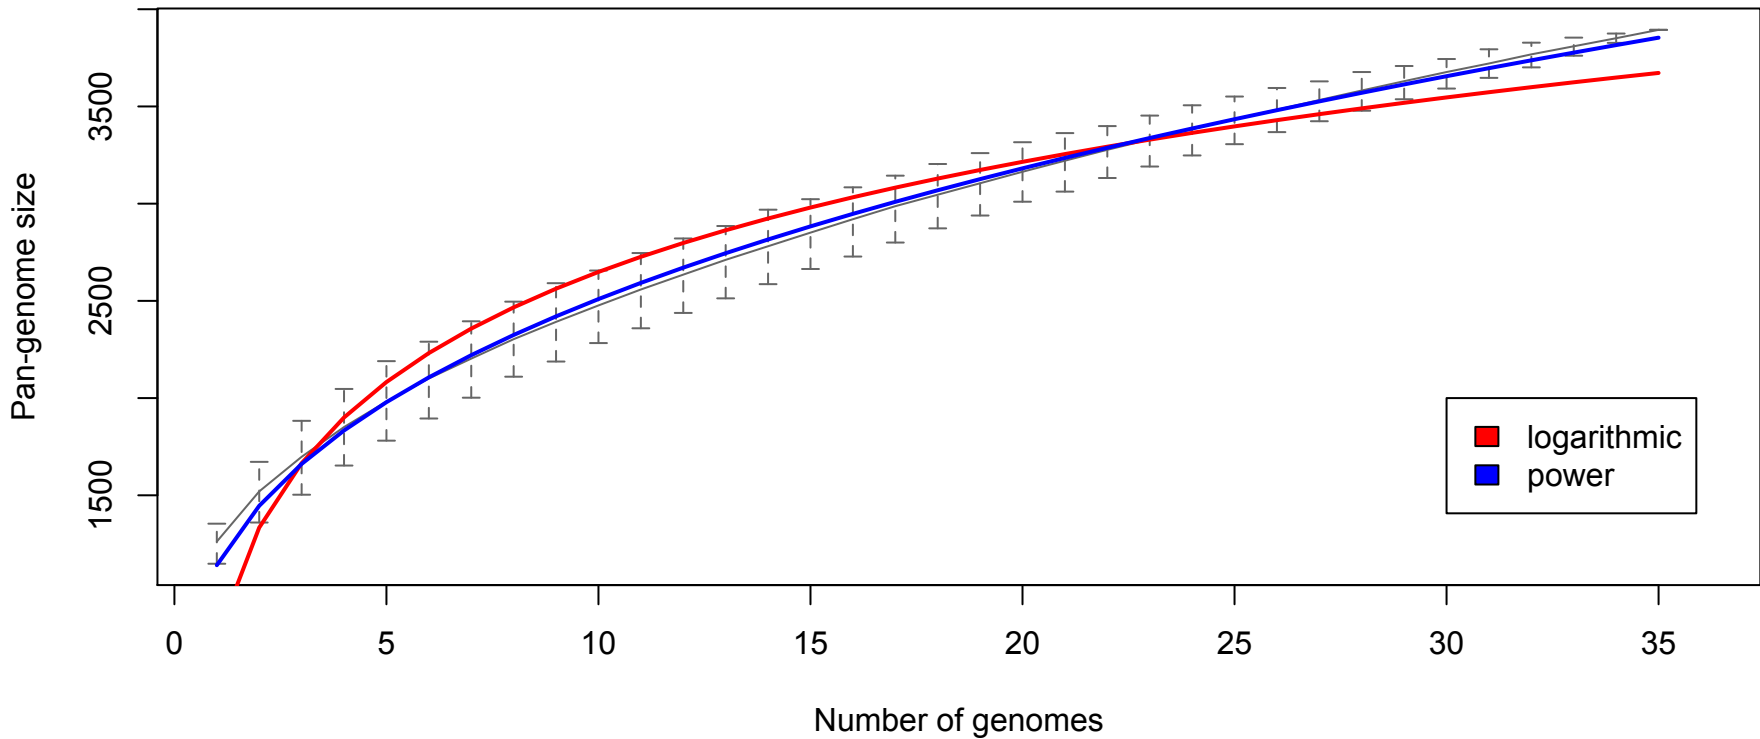

Supplement: EVA-11-312-s001.pdf [file EVA-11-312-s001.pdf]
