# Supplementary material for: Focusing the diversity of Gardnerella vaginalis through the lens of ecotypes
Source: PubMed Central journal article supplement (PMC5881158; doi:10.1111/eva.12555), 2017-11-16
Supplement: EVA-11-312-s003.pdf [file EVA-11-312-s003.pdf]

**Table S1. Genomic and clinical characteristics of 20 *Bifidobacterium* spp. strains.**

| Strain                                                      | GenBank accession(s)         | Genomic characteristics <sup>a</sup> |         |          |      |       | Clinical and phenotypic characteristics <sup>b</sup> |                       |
|-------------------------------------------------------------|------------------------------|--------------------------------------|---------|----------|------|-------|------------------------------------------------------|-----------------------|
|                                                             |                              | Size (Mb)                            | Contigs | Plasmids | GC%  | CDS   | Source                                               | Specific Comments     |
| <i>Bifidobacterium adolescentis</i> L2-32                   | AAXD00000000                 | 2.389                                | 35      | 0        | 59.2 | 2,031 | GI tract                                             | Infant feces          |
| <i>Bifidobacterium animalis</i> subsp. <i>lactis</i> B420   | CP003497.1                   | 1.939                                | 1       | 0        | 60.5 | 1,604 | Unknown                                              | NR                    |
| <i>Bifidobacterium animalis</i> subsp. <i>lactis</i> Bi-07  | CP003498.1                   | 1.939                                | 1       | 0        | 60.5 | 1,601 | Unknown                                              | NR                    |
| <i>Bifidobacterium animalis</i> subsp. <i>lactis</i> V9     | CP001892                     | 1.944                                | 1       | 0        | 60.5 | 1,613 | GI tract                                             | Infant feces          |
| <i>Bifidobacterium bifidum</i> BGN4                         | CP001361.1                   | 2.224                                | 1       | 0        | 62.6 | 1,828 | GI tract                                             | Feces                 |
| <i>Bifidobacterium breve</i> 12L                            | CP006711.1                   | 2.245                                | 1       | 0        | 58.9 | 1,907 | Mammary gland                                        | Human milk            |
| <i>Bifidobacterium breve</i> 689b                           | CP006715.1                   | 2.332                                | 1       | 0        | 58.7 | 1,991 | GI tract                                             | Infant feces          |
| <i>Bifidobacterium breve</i> ACS-071-V-Sch8b                | CP002743                     | 2.327                                | 1       | 0        | 58.7 | 1,972 | Urogenital tract                                     | NR                    |
| <i>Bifidobacterium breve</i> JCM 7017                       | CP006712.1                   | 2.289                                | 1       | 0        | 58.7 | 1,944 | GI tract                                             | Infant feces          |
| <i>Bifidobacterium breve</i> JCM 7019                       | CP006713.1                   | 2.359                                | 1       | 0        | 58.6 | 2,073 | GI tract                                             | Adult feces           |
| <i>Bifidobacterium breve</i> JCP7499                        | AWSX00000000                 | 2.367                                | 91      | 0        | 58.6 | 2,073 | Urogenital tract                                     | Vagina                |
| <i>Bifidobacterium breve</i> NCFB 2258                      | CP006714.1                   | 2.316                                | 1       | 0        | 58.7 | 1,978 | GI tract                                             | Infant feces          |
| <i>Bifidobacterium breve</i> S27                            | CP006716.1                   | 2.294                                | 1       | 0        | 58.7 | 1,948 | GI tract                                             | Infant feces          |
| <i>Bifidobacterium breve</i> UCC2003                        | CP000303                     | 2.423                                | 1       | 0        | 58.7 | 2,071 | GI tract                                             | Nursing infant feces  |
| <i>Bifidobacterium longum</i> NCC2705                       | AE014295, AF540971           | 2.26                                 | 1       | 1        | 60.1 | 1,868 | GI tract                                             | Infant feces          |
| <i>Bifidobacterium longum</i> subsp. <i>infantis</i> 157F   | AP010890, AP010891, AP010892 | 2.409                                | 1       | 2        | 60.1 | 2,058 | GI tract                                             | NR                    |
| <i>Bifidobacterium longum</i> subsp. <i>longum</i> BBMN68   | CP002286                     | 2.266                                | 1       | 0        | 59.9 | 1,882 | GI tract                                             | Long-lived adult male |
| <i>Bifidobacterium longum</i> subsp. <i>longum</i> F8       | FP929034                     | 2.385                                | 1       | 0        | 59.6 | 1,997 | GI tract                                             | NR                    |
| <i>Bifidobacterium longum</i> subsp. <i>longum</i> JCM 1217 | AP010888                     | 2.385                                | 1       | 0        | 60.3 | 1,998 | GI tract                                             | NR                    |
| <i>Bifidobacterium thermophilum</i> RBL67                   | CP004346.1                   | 2.292                                | 1       | 0        | 60.1 | 1,839 | GI tract                                             | Infant feces          |

<sup>a</sup> Genomes were downloaded from the PATRIC database (<ftp://ftp.patricbrc.org/patric2/>) in March 2015. CDS = coding DNA sequence.

<sup>b</sup> Gathered from information available in PATRIC. NR = not reported.
